# Supplementary material
Source: MDPI journal article supplement (https://www.mdpi.com/2071-1050/15/7/5623)
Supplement: s1 [file s1]

## Supplementary materials

**Table S1.** Effect of the interaction between irrigation intervals and CMS lines on plant traits during the 2020 and 2021 seasons.

| CMS lines | Irrigation intervals | NOL     |         | DCLN    |         | FLA (cm) |        | PH (cm) |         |
|-----------|----------------------|---------|---------|---------|---------|----------|--------|---------|---------|
|           |                      | 2020    | 2021    | 2020    | 2021    | 2020     | 2021   | 2020    | 2021    |
| L1        | CF                   | 19.49a  | 20.04a  | 100.33a | 101.89a | 29.22d   | 30.56d | 118.04a | 120.23a |
|           | I <sub>6</sub>       | 18.68ab | 19.26ab | 99.03b  | 100.59b | 27.75f   | 29.09f | 112.26c | 114.45c |
|           | I <sub>9</sub>       | 17.92bc | 18.50bc | 98.58c  | 100.15c | 26.53g   | 27.87g | 108.04e | 110.23e |
|           | I <sub>12</sub>      | 17.32c  | 17.90c  | 97.81d  | 99.37d  | 26.64g   | 27.98g | 105.84g | 108.04g |
|           | I <sub>15</sub>      | 16.24d  | 16.82d  | 96.67e  | 98.23e  | 25.48h   | 26.82h | 102.51i | 104.69i |
| L2        | CF                   | 16.29d  | 16.87d  | 81.15f  | 82.71f  | 33.83a   | 35.17a | 113.24b | 115.43b |
|           | I <sub>6</sub>       | 15.48de | 16.06de | 80.76f  | 82.32f  | 31.30b   | 32.64b | 109.29d | 111.48d |
|           | I <sub>9</sub>       | 15.03e  | 15.61e  | 80.06g  | 81.62g  | 30.53c   | 31.87c | 107.02f | 109.21f |
|           | I <sub>12</sub>      | 15.16e  | 15.74e  | 79.59h  | 81.15h  | 28.75e   | 30.09e | 103.72h | 105.93h |
|           | I <sub>15</sub>      | 14.15f  | 14.73f  | 78.52i  | 80.08i  | 27.76f   | 29.10f | 100.95j | 103.14j |

a,b,c,d,e,f,g,h,i, and j: values in the same CMS line, column, and season not sharing similar letters are significantly different ( $P > 0.05$ ).

**Table S2.** Effect of interaction between the irrigation intervals and CMS lines on plant floral traits in both seasons.

| CMS lines | Irrigation intervals | PL (cm) |         | PE (%) |        | DSO (min) |         |
|-----------|----------------------|---------|---------|--------|--------|-----------|---------|
|           |                      | 2020    | 2021    | 2020   | 2021   | 2020      | 2021    |
| L1        | CF                   | 23.86a  | 23.91a  | 73.37a | 75.62a | 161.13c   | 161.24d |
|           | I <sub>6</sub>       | 22.95bc | 23.00bc | 67.41c | 69.66c | 156.54e   | 156.56e |
|           | I <sub>9</sub>       | 23.08b  | 23.13b  | 60.71f | 62.96f | 151.26f   | 150.72g |
|           | I <sub>12</sub>      | 21.07e  | 21.13e  | 67.05c | 69.30c | 143.56g   | 141.42i |
|           | I <sub>15</sub>      | 21.53d  | 21.58d  | 64.98d | 67.23d | 132.94i   | 131.46j |
| L2        | CF                   | 22.74c  | 22.79c  | 70.11b | 72.36b | 171.54a   | 171.70a |
|           | I <sub>6</sub>       | 21.48d  | 21.53d  | 67.05c | 69.63c | 163.86b   | 165.25b |
|           | I <sub>9</sub>       | 21.03e  | 21.08e  | 65.32d | 67.57d | 157.42d   | 162.37c |
|           | I <sub>12</sub>      | 20.74f  | 20.79f  | 63.04e | 65.29e | 151.39f   | 154.31f |
|           | I <sub>15</sub>      | 19.75g  | 19.80g  | 61.14f | 63.39f | 138.59h   | 142.86h |

a,b,c,d,e,f,g,h,i, and j: values in the same column and season not sharing similar letters are significantly different ( $P > 0.05$ ).

**Table S3.** Effect of interaction between the CMS lines and irrigation periods on panicle traits and yield during the 2020 and 2021 seasons.

| CMS Lines | Irrigation intervals | PW (g) |       | SS (%) |        | SY (t ha <sup>-1</sup> ) |        | HI (%)  |        | NFP    |        |
|-----------|----------------------|--------|-------|--------|--------|--------------------------|--------|---------|--------|--------|--------|
|           |                      | 2020   | 2021  | 2020   | 2021   | 2020                     | 2021   | 2020    | 2021   | 2020   | 2021   |
| L1 X R    | CF                   | 3.17a  | 3.31a | 31.92a | 39.40a | 1.850a                   | 1.935a | 19.23a  | 20.44a | 20.38a | 21.39a |
|           | I <sub>6</sub>       | 2.83c  | 3.12c | 27.29a | 30.12c | 1.424c                   | 1.537c | 17.88c  | 19.08c | 19.31b | 20.06b |
|           | I <sub>9</sub>       | 2.51e  | 2.78e | 22.71d | 25.46f | 1.312e                   | 1.391e | 16.82d2 | 17.78e | 18.37d | 19.17d |
|           | I <sub>12</sub>      | 2.16g  | 2.42g | 20.55e | 23.15f | 1.226g                   | 1.290g | 15.57e  | 16.48g | 16.78e | 17.72e |
|           | I <sub>15</sub>      | 1.78i  | 2.04i | 12.79g | 15.27h | 0.958i                   | 1.041i | 13.21g  | 14.26i | 10.48h | 11.51g |
| L2 X R    | CF                   | 3.13b  | 3.16b | 32.00a | 35.12b | 1.606b                   | 1.744b | 18.73b  | 19.44b | 18.67c | 19.51c |
|           | I <sub>6</sub>       | 2.72d  | 2.97d | 24.50c | 27.31d | 1.365d                   | 1.468d | 16.88d  | 18.26d | 16.73e | 17.36f |
|           | I <sub>9</sub>       | 2.42f  | 2.67e | 20.69e | 23.42f | 1.267f                   | 1.351f | 15.68e  | 17.06f | 15.21f | 16.14g |
|           | I <sub>12</sub>      | 2.09h  | 2.36h | 18.19f | 20.87g | 1.162h                   | 1.238h | 14.43f  | 15.81h | 13.43g | 14.06h |
|           | I <sub>15</sub>      | 1.73j  | 1.99j | 11.53h | 14.09i | 0.921j                   | 1.000j | 12.49h  | 13.87j | 9.29i  | 10.11j |

a,b,c,d,e,f,g,h,i, and j: values in the same column and season not sharing similar letters are significantly different

(P > 0.05).
